# Supplementary material for: High correlation between skin color based on CIELAB color space, epidermal melanocyte ratio, and melanocyte melanin content
Source: PeerJ. 2018 May 24;6:e4815. doi: 10.7717/peerj.4815 (PMC5971097; doi:10.7717/peerj.4815)
Supplement: Supplemental Information 2 [file peerj-06-4815-s002.xlsx]

## Sheet: 工作表1
	Blank	PHEMs	PHEKs	L40	L50
Day0-1	94.4	57.6	88.2	86.6	88.1
Day0-2	94.9	54.3	87.3	87.5	87.6
Day0-3	93.2	56.6	88.9	87.1	87.4
0	94.1667	56.1667	88.1333	87.0667	87.7
Day0 (SD)	0.873689	1.69214	0.802081	0.450925	0.360555
Day10-1	93.1	54.1	86.8	86.1	87.5
Day10-2	94.3	56.8	87.1	85.9	86.8
Day10-3	94.8	55.2	86.4	84.3	86.1
10	94.0667	55.3667	86.7667	85.4333	86.8
Day10 (SD)	0.873689	1.35769	0.351188	0.986577	0.7
Day20-1	94.3	52.5	84.4	72.5	75.5
Day20-2	94.6	53.6	83.1	71.5	76.2
Day20-3	93.1	50.4	86.1	71.4	77.8
20	94	52.1667	84.5333	71.8	76.5
Day20 (SD)	0.793725	1.62583	1.50444	0.608276	1.17898
Day30-1	94.3	44.2	81.6	58.6	71.3
Day30-2	93.6	42.6	81.8	58.3	69.3
Day30-3	92.9	44.5	80.4	56.9	70.6
30	93.6	43.7667	81.2667	57.9333	70.4
Day30 (SD)	0.7	1.02144	0.757188	0.907377	1.01489
Day40-1	92.6	40.5	80.4	52.1	63
Day40-2	94.6	34.6	80.9	52.6	63.7
Day40-3	93.2	38.4	81.2	51.2	61.9
40	93.4667	37.8333	80.8333	51.9667	62.8667
Day40 (SD)	1.02632	2.99054	0.404145	0.70946	0.907377
Day50-1	92.1	34.5	80.2	48.8	52.5
Day50-2	94.6	32.6	80.9	48.1	52.9
Day50-3	93.8	36.7	79.2	45.6	51.8
50	93.5	34.6	80.1	47.5	52.4
Day50 (SD)	1.27671	2.05183	0.8544	1.68226	0.556776
Day60-1	94.1	30.2	80.5	43.6	51.1
Day60-2	92.4	31.2	79.8	46.6	50.4
Day60-3	93.2	31.8	80.2	45	51.7
60	93.2333	31.0667	80.1667	45.0667	51.0667
Day60 (SD)	0.85049	0.80829	0.351188	1.50111	0.650641
Day70-1	92.4	30.9	79.8	43.2	51.2
Day70-2	92.1	30.2	80.3	45.5	50.1
Day70-3	93.6	29.8	79.1	41.8	50.7
70	92.7	30.3	79.7333	43.5	50.6667
Day70 (SD)	0.793725	0.556776	0.602771	1.86815	0.550757
